# Supplementary material for: Benthic ecosystem functioning under climate change: modelling the bioturbation potential for benthic key species in the southern North Sea
Source: PeerJ journal article supplement (doi:10.7717/peerj.14105), 2022-10-26
Supplement: Weinert_et_al._ID_67627_supplementary_material_S1_3rd_revision.pdf [file Weinert_et_al._ID_67627_supplementary_material_S1_3rd_revision.pdf]

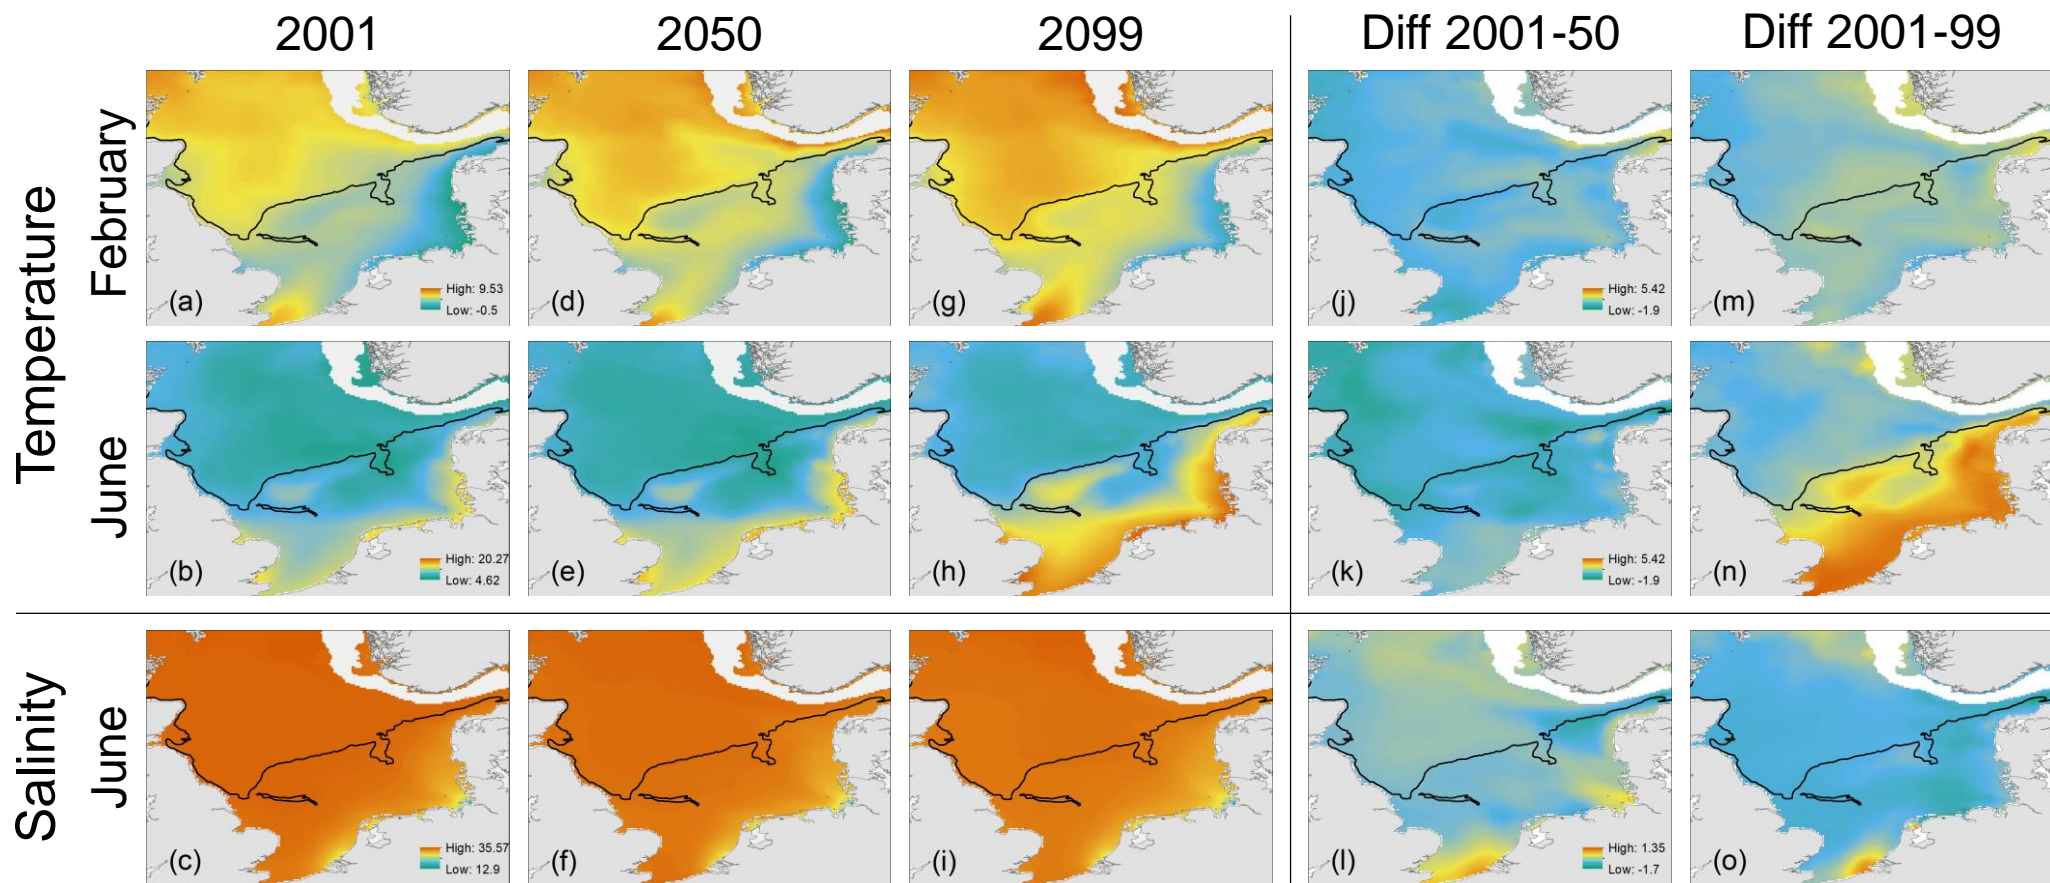

S1 Mean bottom temperatures [ $^{\circ}\text{C}$ ] (a, b, d, e, g, h) and salinity (c, f, i) in the North Sea for February and June 2001, 2050 and 2099, and as well the differences between the years (j-o). Diff = difference, black line: 50 m depth contour. The projected mean bottom temperature and salinity for 2050 and 2099 are based on IPCC A1B scenario (modified after *Weinert et al. 2016*).
