# Supplementary material for: Benthic ecosystem functioning under climate change: modelling the bioturbation potential for benthic key species in the southern North Sea
Source: PeerJ journal article supplement (doi:10.7717/peerj.14105), 2022-10-26
Supplement: Weinert_et_al._ID_67627_supplementary_material_S2_2nd_revision.pdf [file Weinert_et_al._ID_67627_supplementary_material_S2_2nd_revision.pdf]

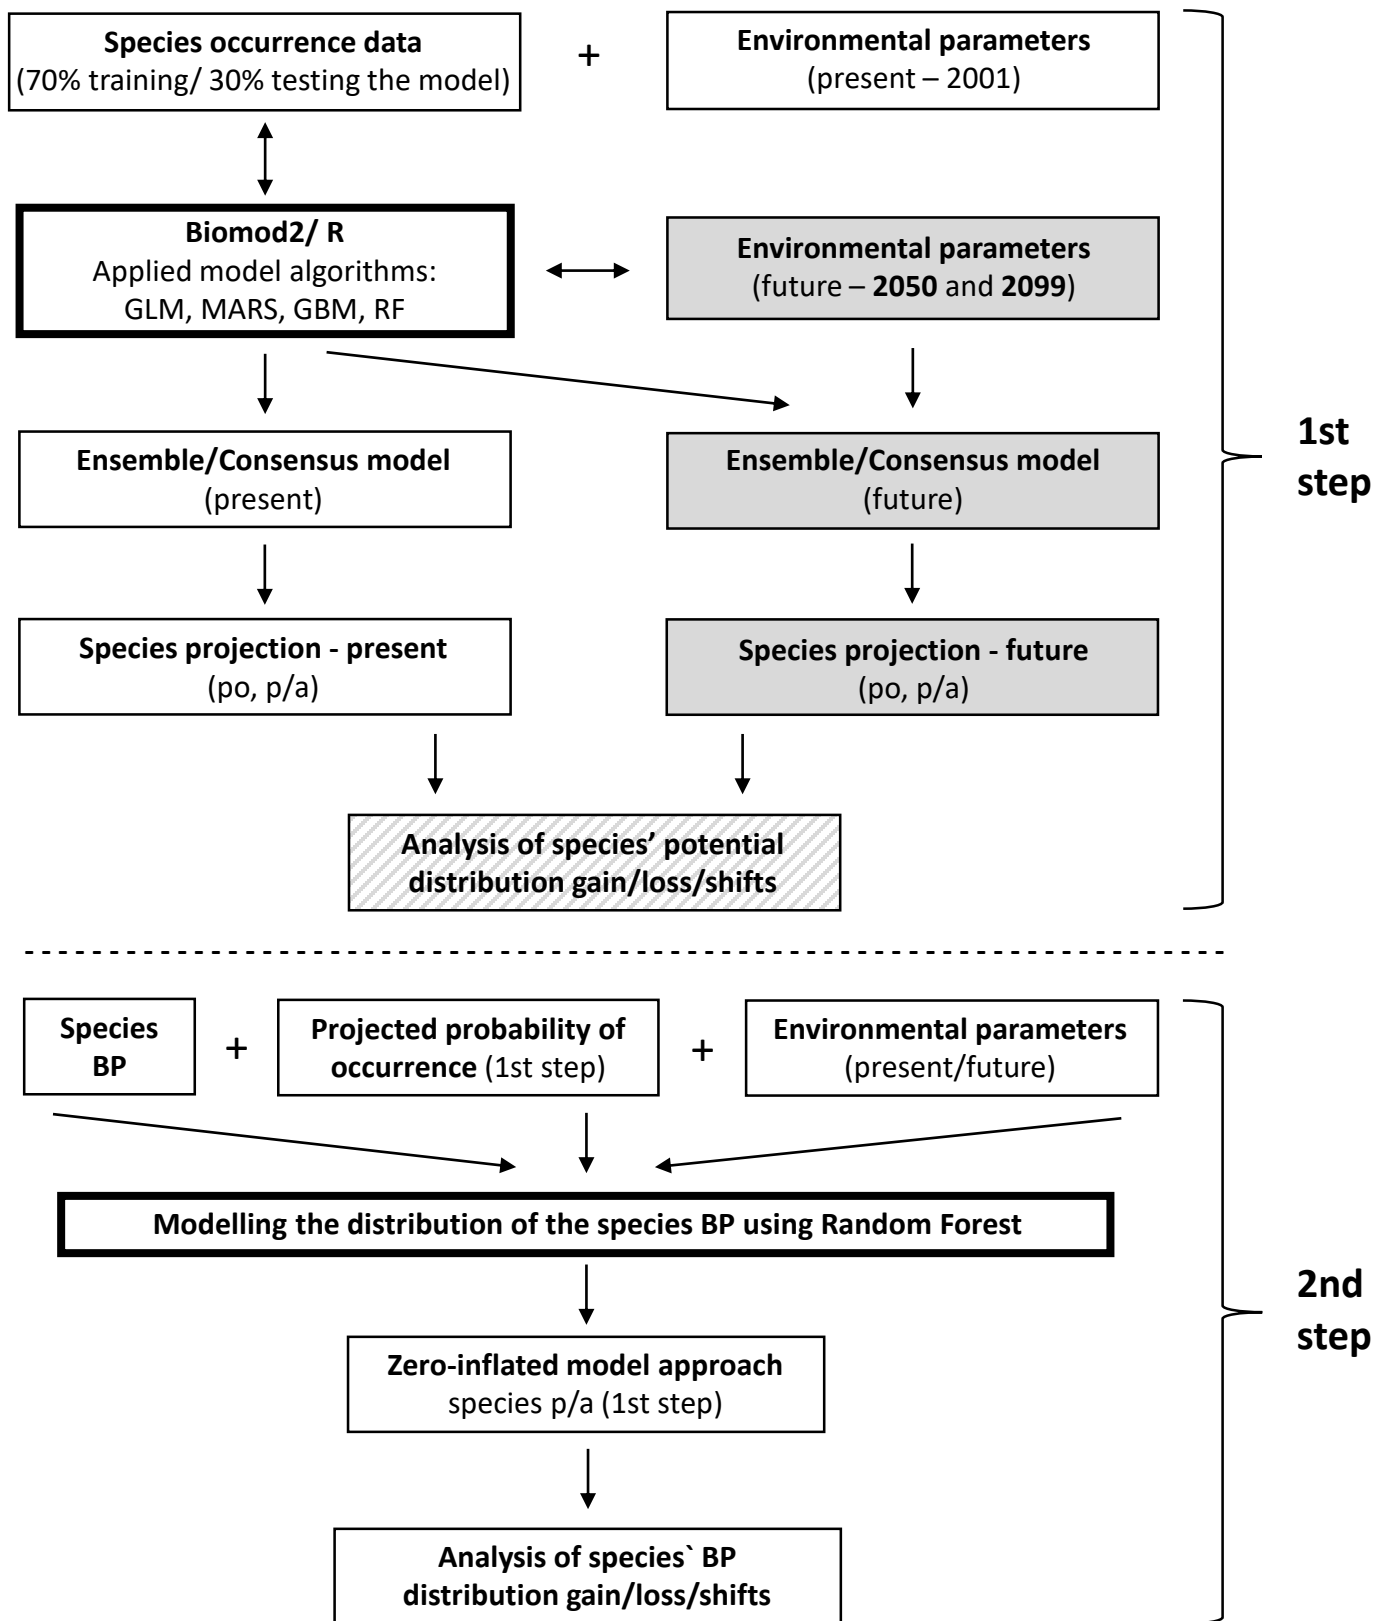

**S2** Shows the general work-flow of the two step approach. First, Species Distribution Models (biomod2) were applied, to model and project the species distribution (po = species probability of occurrence, p = species presence, a = species absence.) Second, Random Forest was applied to model and project the species bioturbation potential (BP).
